# Supplementary material
Source: HighWire-hosted journal article supplement (https://www.life-science-alliance.org/content/1/5/e201800162/F6)

**Figure 4B**

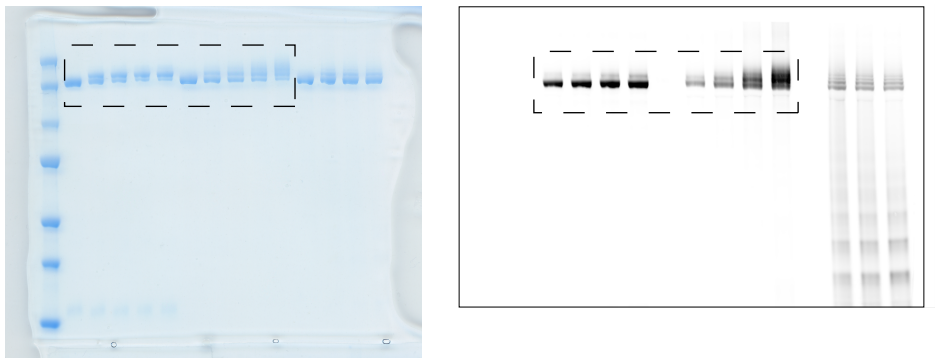

**Figure 4C**

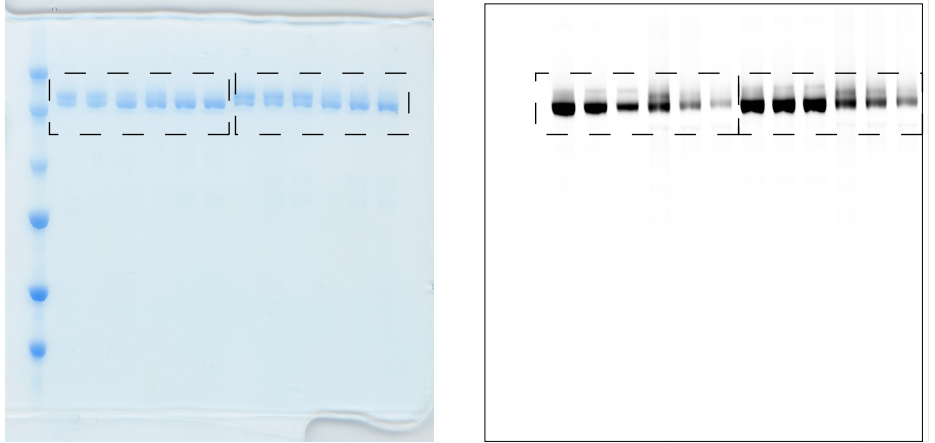

Supplement: inline-supplementary-material-4 [file inline-supplementary-material-4.pdf]
